# Supplementary material for: Evaluating the Efficacy of Five Chlorophyll-a Algorithms in Chesapeake Bay (USA) for Operational Monitoring and Assessment
Source: MDPI journal article supplement (doi:10.3390/jmse10081104), 2022-08-12
Supplement: s1 [file s1]

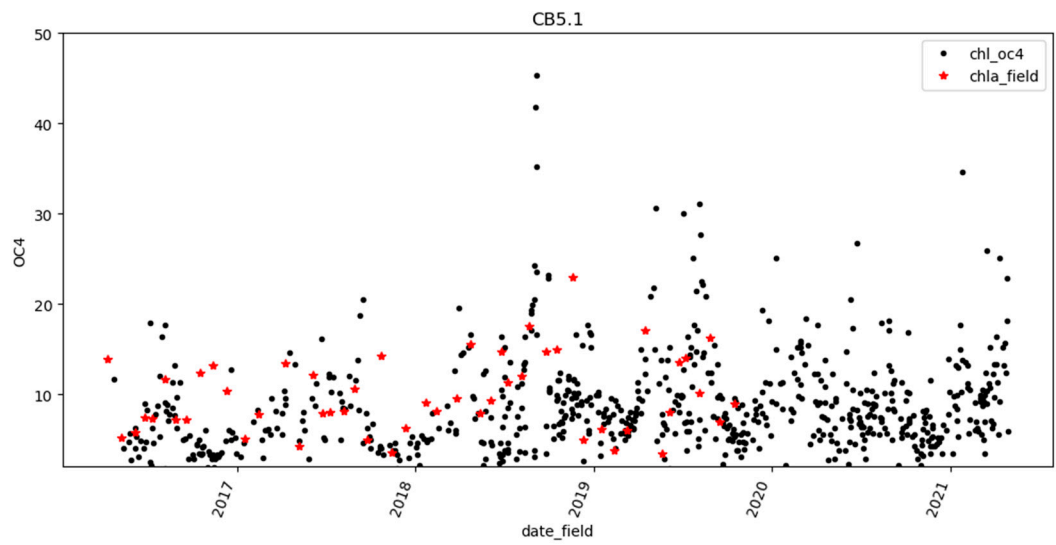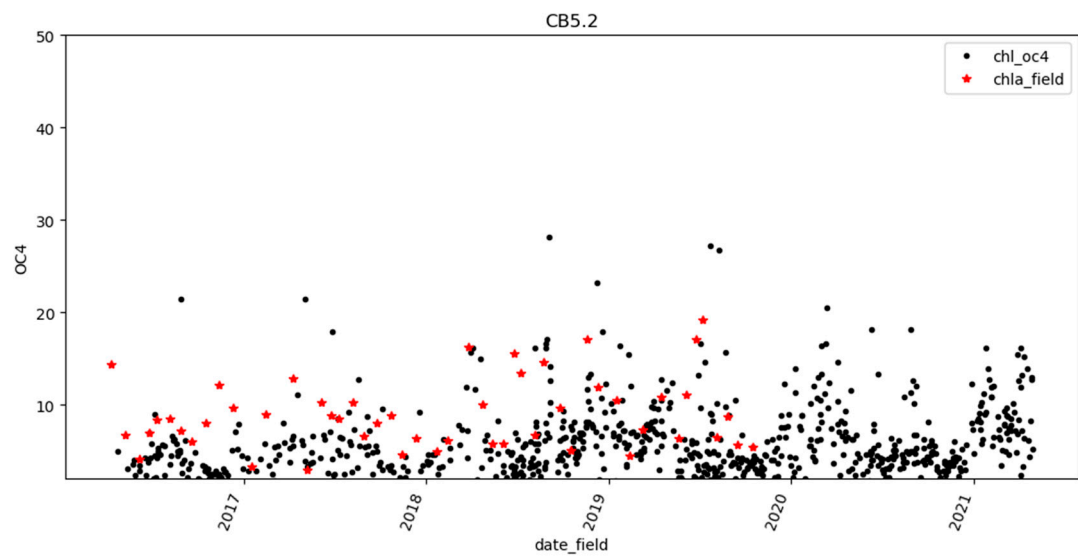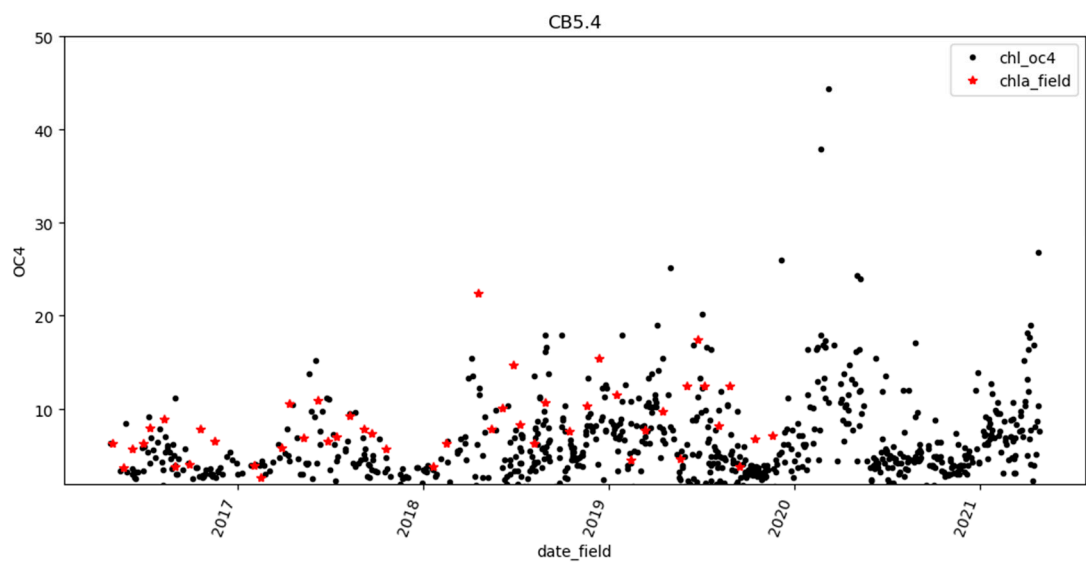

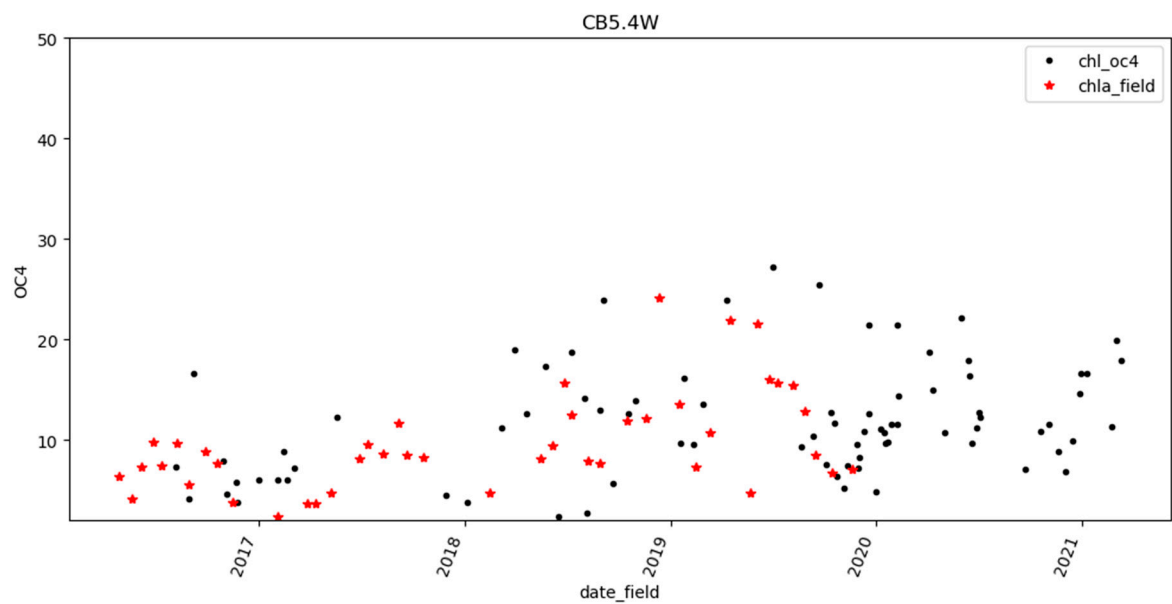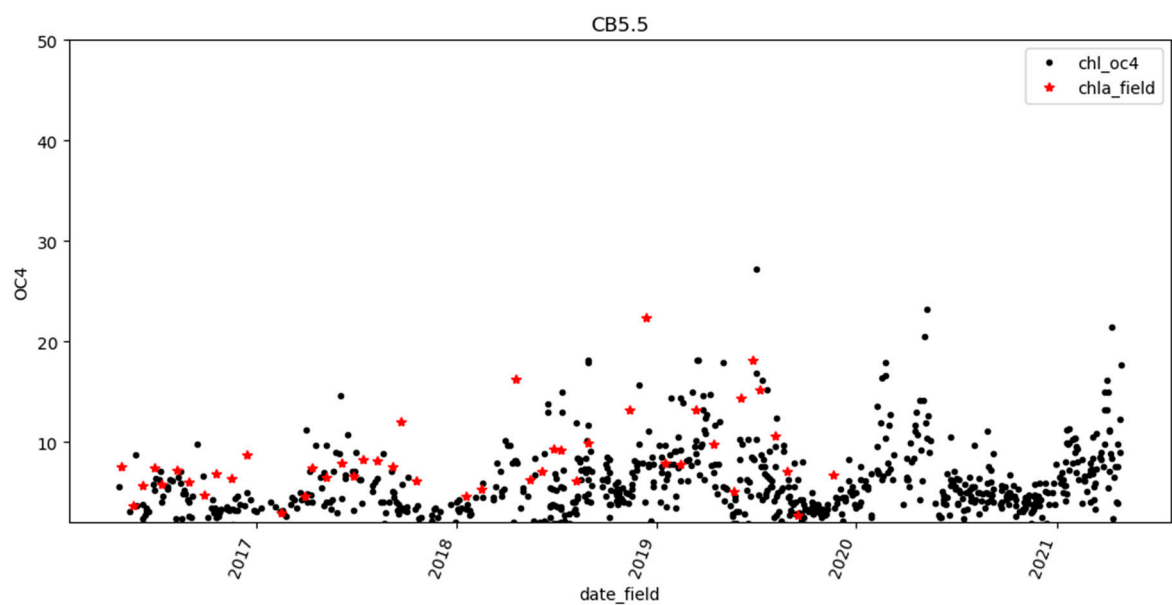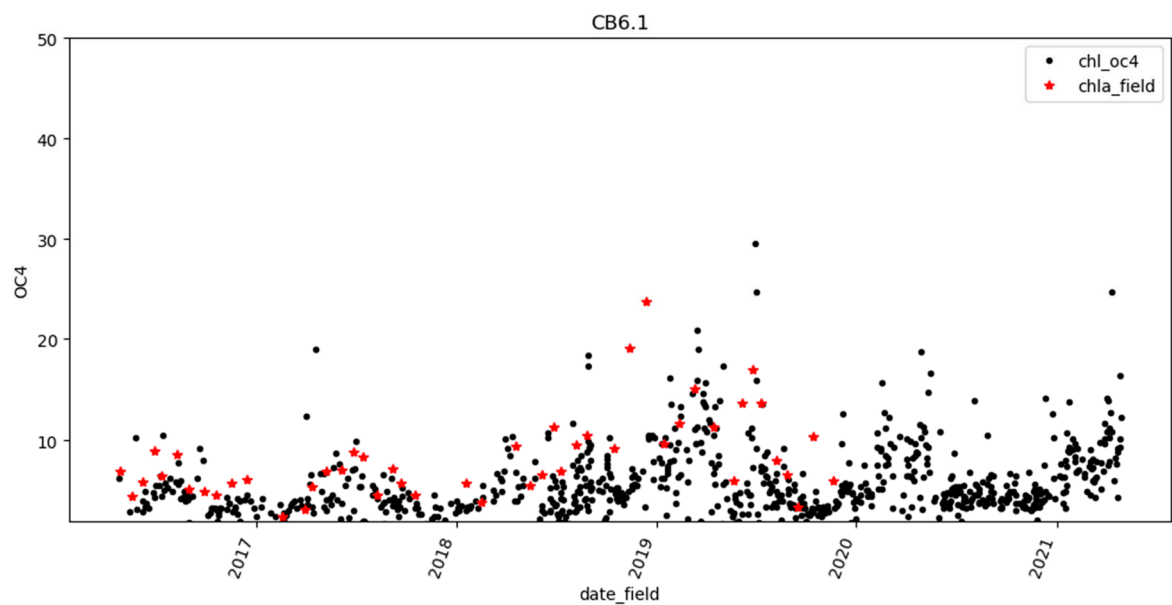

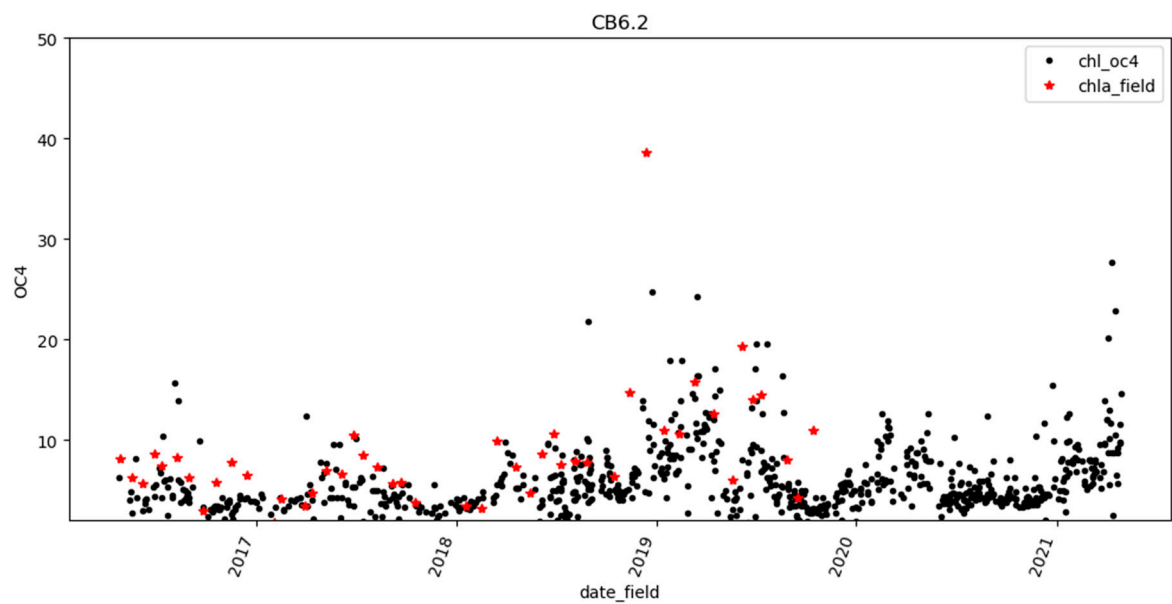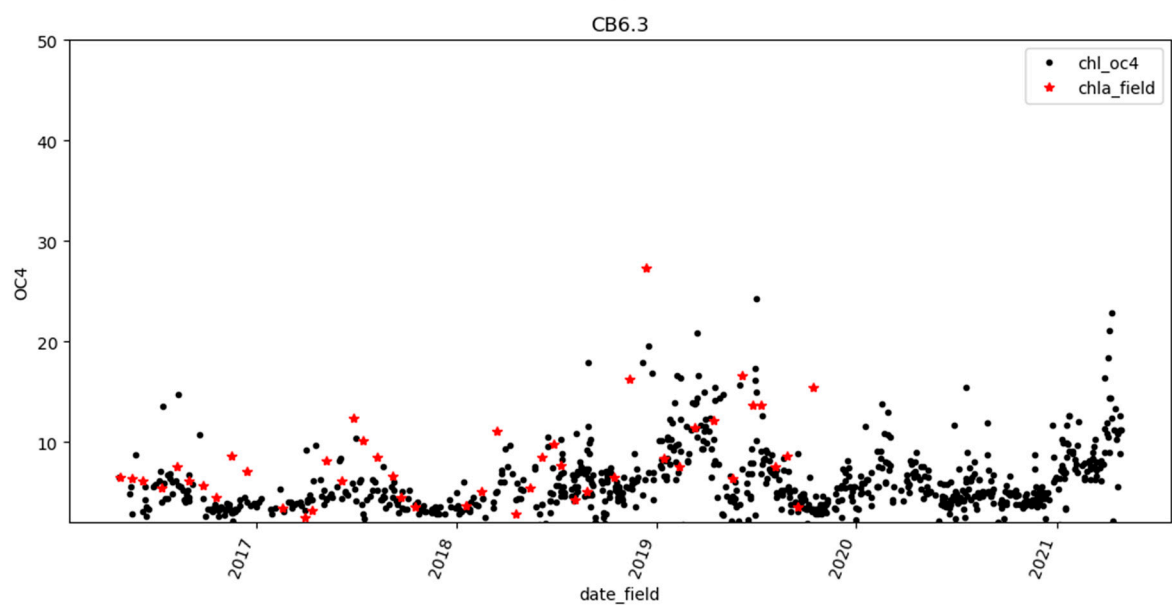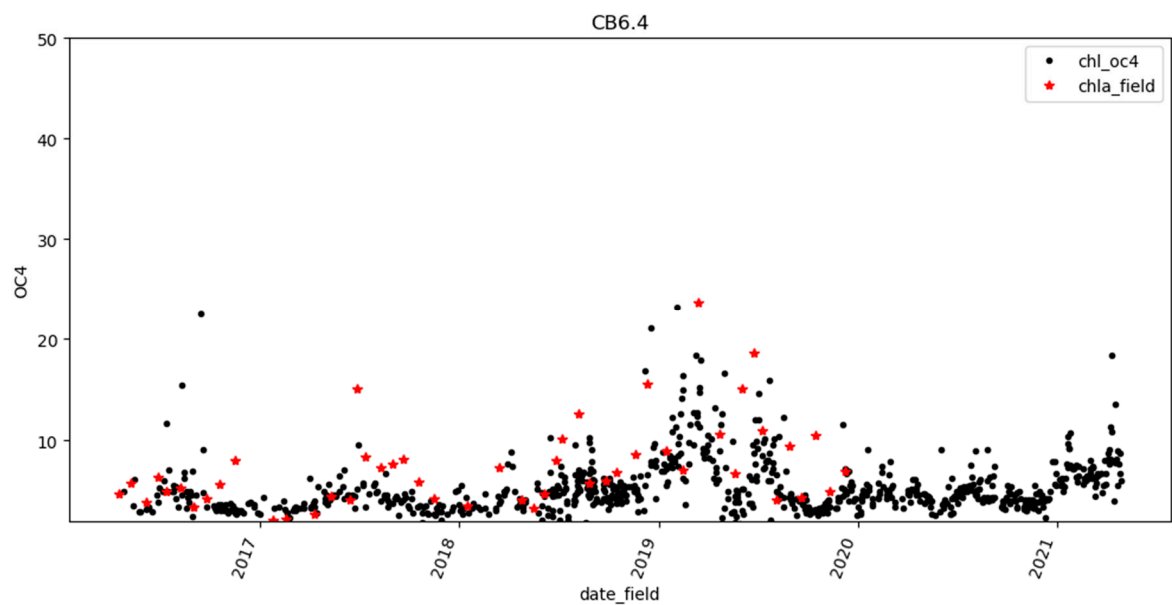

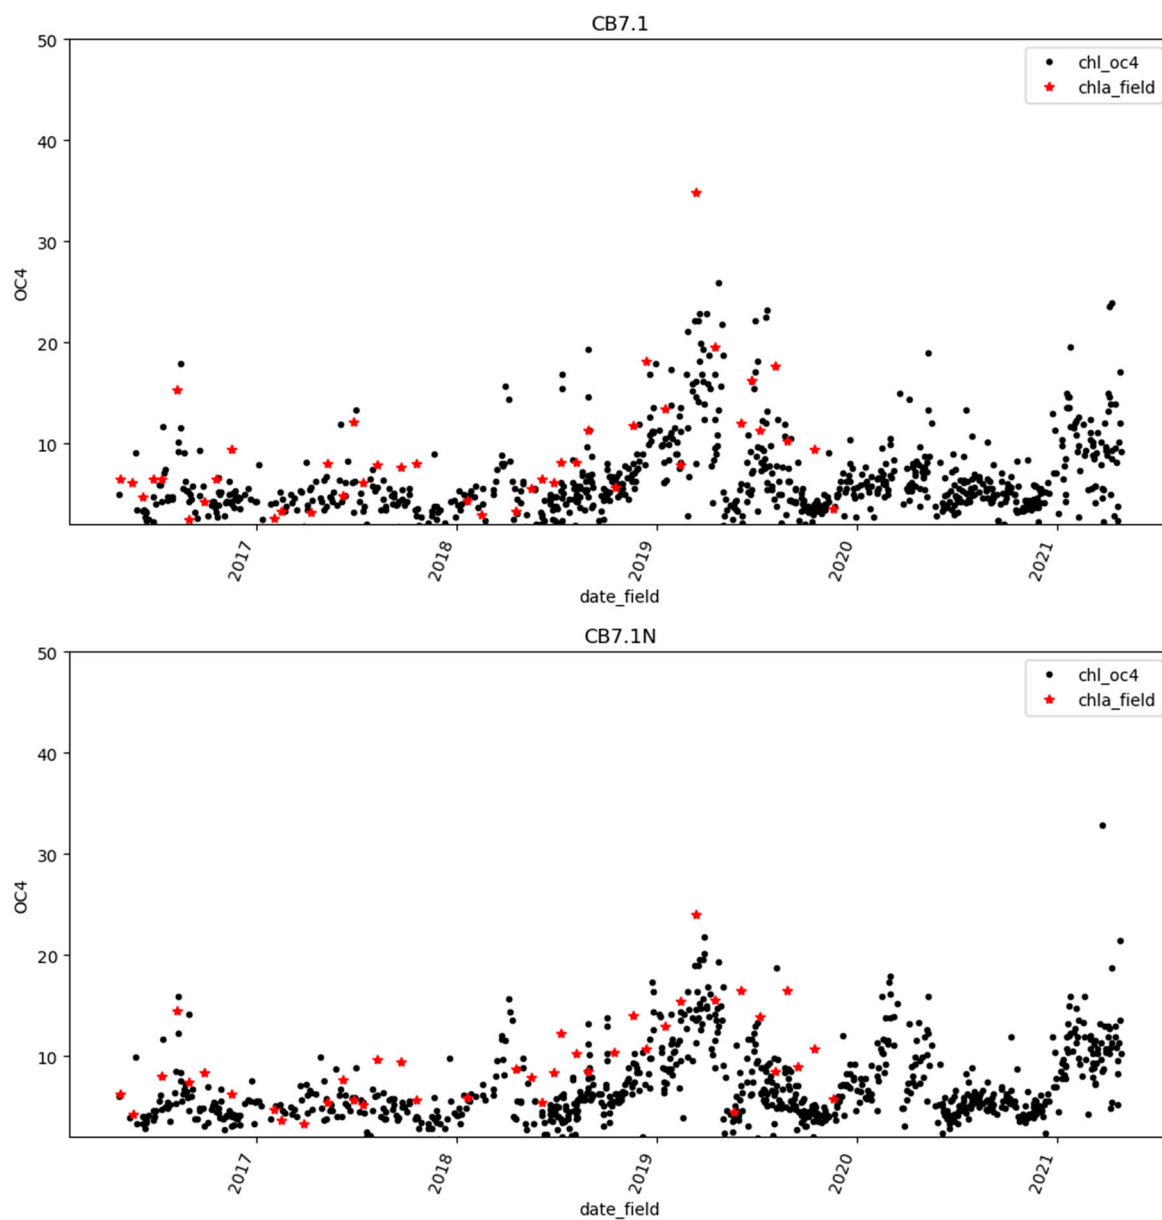

**Figure S1.** Shows time series plots of the RE10 *chla* algorithm (black dots) along with any available field data (red stars) for the remainder of the CBP stations depicted in Figure 1.
